# Supplementary material for: A novel supramolecular AIE π-gel for fluorescence detection and separation of metal ions from aqueous solution
Source: Royal Society of Chemistry journal article supplement (doi:10.1039/c9sm01270b), 2019-01-01
Supplement: c9sm01270b1.pdf [file c9sm01270b1.pdf]

## Supporting information

### **A novel supramolecular AIE $\pi$ -gel for fluorescent detection and separation of metal ions from aqueous solution**

Tai-Bao Wei\*, Qin-Peng Zhang, Yan-Qing Fan, Peng-Peng Mao, Jiao Wang, Xiao-Wen Guan, You-Ming

Zhang, Hong Yao and Qi Lin\*

*Key Laboratory of Polymer Materials of Gansu Province, Research Center of Gansu Military and Civilian Integration Advanced Structural Materials, College of Chemistry and Chemical Engineering, Northwest Normal University, Lanzhou 730070, China. E-mail: weitaibao@126.com; linqi2004@126.com.*

## Contents

|                                                                                                                                                                                                                                                                                                                                                                                                                                                                                                      |    |
|------------------------------------------------------------------------------------------------------------------------------------------------------------------------------------------------------------------------------------------------------------------------------------------------------------------------------------------------------------------------------------------------------------------------------------------------------------------------------------------------------|----|
| <b>Materials and methods</b> .....                                                                                                                                                                                                                                                                                                                                                                                                                                                                   | 4  |
| <b>Scheme S1</b> Synthesis of <b>ND</b> and <b>TCP</b> . .....                                                                                                                                                                                                                                                                                                                                                                                                                                       | 4  |
| <b>Synthesis of ND</b> .....                                                                                                                                                                                                                                                                                                                                                                                                                                                                         | 5  |
| <b>Synthesis of TCP</b> .....                                                                                                                                                                                                                                                                                                                                                                                                                                                                        | 5  |
| <b>Fig. S1</b> The <sup>1</sup> H NMR spectra of <b>ND</b> in DMSO- <i>d</i> <sub>6</sub> (600 MHz, 298K).....                                                                                                                                                                                                                                                                                                                                                                                       | 6  |
| <b>Fig. S2</b> The <sup>13</sup> C NMR spectra of <b>ND</b> in DMSO- <i>d</i> <sub>6</sub> (150 MHz, 298K).....                                                                                                                                                                                                                                                                                                                                                                                      | 6  |
| <b>Fig. S3</b> ESI-MS spectra of compound <b>ND</b> . .....                                                                                                                                                                                                                                                                                                                                                                                                                                          | 7  |
| <b>Fig. S4</b> <sup>1</sup> H NMR spectra of compound <b>TCP</b> in DMSO- <i>d</i> <sub>6</sub> (600 MHz, 298K). .....                                                                                                                                                                                                                                                                                                                                                                               | 7  |
| <b>Fig. S5</b> The <sup>13</sup> C NMR spectra of <b>TCP</b> DMSO- <i>d</i> <sub>6</sub> (150 MHz, 298K).....                                                                                                                                                                                                                                                                                                                                                                                        | 8  |
| <b>Fig. S6</b> ESI-MS spectra of <b>TCP</b> . .....                                                                                                                                                                                                                                                                                                                                                                                                                                                  | 8  |
| <b>Table S1</b> Gelation behavior of the <b>ONT</b> in different solvents.....                                                                                                                                                                                                                                                                                                                                                                                                                       | 9  |
| <b>Fig. S7</b> Fluorescent spectra of the <b>ND</b> , <b>TCP</b> and the π-gel <b>ONT</b> in DMSO-H <sub>2</sub> O (2:1, v/v) binary solution and λ <sub>ex</sub> = 350 nm, respectively.....                                                                                                                                                                                                                                                                                                        | 10 |
| <b>Fig. S8</b> Partial concentration-dependent <sup>1</sup> H NMR spectra (400 MHz, 298 K) of the <b>ONT</b> at various concentrations: (a) 4.0 mM; (b) 8.0 mM; (c) 12.0 mM; (d) 16.0 mM .....                                                                                                                                                                                                                                                                                                       | 10 |
| <b>Fig. S9</b> ESI-MS spectra of the host-guest complex ( <b>ONT</b> ) formed between <b>ND</b> and <b>TCP</b> . .....                                                                                                                                                                                                                                                                                                                                                                               | 11 |
| <b>Fig. S10</b> FT-IR spectra of (a) Powder <b>ND</b> , <b>TCP</b> and xerogel <b>ONT</b> ; (b) Xerogel <b>ONT</b> , <b>Fe-ONT</b> and xerogel <b>Cu-ONT</b> . .....                                                                                                                                                                                                                                                                                                                                 | 11 |
| <b>Fig. S11</b> XRD patterns of (a) Powder <b>NT</b> (the mixtures of <b>ND</b> and <b>TCP</b> ) and xerogel <b>ONT</b> ; (b) Xerogel <b>ONT</b> , xerogel <b>Fe-ONT</b> and xerogel <b>Cu-ONT</b> . .....                                                                                                                                                                                                                                                                                           | 12 |
| <b>Fig. S12</b> The photograph of the linear range: the <b>ONT</b> for Fe <sup>3+</sup> .....                                                                                                                                                                                                                                                                                                                                                                                                        | 12 |
| <b>Fig. S13</b> SEM images of (a) Xerogel <b>ONT</b> ; (b) Powder <b>ND</b> ; (c) Powder <b>TCP</b> ; (d) Xerogel <b>Fe-ONT</b> ; (e) Xerogel <b>Cu-ONT</b> . .....                                                                                                                                                                                                                                                                                                                                  | 13 |
| <b>Fig. S14</b> The photograph of the linear range: the <b>ONT</b> for Cu <sup>2+</sup> .....                                                                                                                                                                                                                                                                                                                                                                                                        | 13 |
| <b>Fig. S15</b> The ESI-MS spectra of <b>Fe-ONT</b> . .....                                                                                                                                                                                                                                                                                                                                                                                                                                          | 14 |
| <b>Fig. S16</b> The ESI-MS spectra of <b>Cu-ONT</b> . .....                                                                                                                                                                                                                                                                                                                                                                                                                                          | 14 |
| <b>Fig. S17</b> The control experiment: the fluorescent responses of (a) the <b>ONT</b> and (b) the <b>Fe-ONT</b> to the presence of various cations (Fe <sup>3+</sup> , Mg <sup>2+</sup> , Ca <sup>2+</sup> , Cr <sup>3+</sup> , Co <sup>2+</sup> , Ni <sup>2+</sup> , Zn <sup>2+</sup> , Ag <sup>+</sup> , Cd <sup>2+</sup> , Hg <sup>2+</sup> , Al <sup>3+</sup> , Ba <sup>2+</sup> , Pb <sup>2+</sup> , La <sup>3+</sup> , Eu <sup>3+</sup> and Tb <sup>3+</sup> ). .....                        | 15 |
| <b>Fig. S18</b> The control experiment: the fluorescent responses of (a) the <b>ONT</b> and (b) the <b>Cu-ONT</b> to the presence of various cations (Cu <sup>2+</sup> , Mg <sup>2+</sup> , Ca <sup>2+</sup> , Cr <sup>3+</sup> , Co <sup>2+</sup> , Ni <sup>2+</sup> , Zn <sup>2+</sup> , Ag <sup>+</sup> , Cd <sup>2+</sup> , Hg <sup>2+</sup> , Al <sup>3+</sup> , Ba <sup>2+</sup> , Pb <sup>2+</sup> , La <sup>3+</sup> , Eu <sup>3+</sup> and Tb <sup>3+</sup> ). .....                        | 15 |
| .....                                                                                                                                                                                                                                                                                                                                                                                                                                                                                                | 16 |
| <b>Fig. S19</b> The control experiment: the <b>Fe-ONT</b> treated by water solutions of various anions (F <sup>-</sup> , Cl <sup>-</sup> , Br <sup>-</sup> , I <sup>-</sup> , H <sub>2</sub> PO <sub>4</sub> <sup>-</sup> , AcO <sup>-</sup> , HSO <sub>4</sub> <sup>-</sup> , SCN <sup>-</sup> , ClO <sub>4</sub> <sup>-</sup> , S <sup>2-</sup> and N <sub>3</sub> <sup>-</sup> ). .....                                                                                                           | 16 |
| .....                                                                                                                                                                                                                                                                                                                                                                                                                                                                                                | 16 |
| <b>Fig. S20</b> The control experiment: the <b>Cu-ONT</b> treated by water solutions of various anions (F <sup>-</sup> , Cl <sup>-</sup> , Br <sup>-</sup> , I <sup>-</sup> , H <sub>2</sub> PO <sub>4</sub> <sup>-</sup> , AcO <sup>-</sup> , HSO <sub>4</sub> <sup>-</sup> , SCN <sup>-</sup> , ClO <sub>4</sub> <sup>-</sup> , S <sup>2-</sup> and N <sub>3</sub> <sup>-</sup> ). cations (Fe <sup>3+</sup> , Cu <sup>2+</sup> and the mixtures of Fe <sup>3+</sup> and Cu <sup>2+</sup> ). ..... | 16 |
| <b>Fig. S21</b> The control experiment: the <b>ONT</b> treated by water solutions of various cations ( <b>Fe<sup>2+</sup></b> , <b>Cu<sup>+</sup></b> , <b>Fe<sup>3+</sup></b> and <b>Cu<sup>2+</sup></b> ). .....                                                                                                                                                                                                                                                                                   | 17 |
| <b>Fig. S22</b> The control experiment: the <b>ONT</b> treated by water solutions of various anions (Fe(NO <sub>3</sub> ) <sub>3</sub> ,                                                                                                                                                                                                                                                                                                                                                             |    |

|                                                                                                                                                                                                                                                                                 |    |
|---------------------------------------------------------------------------------------------------------------------------------------------------------------------------------------------------------------------------------------------------------------------------------|----|
| Fe <sub>2</sub> (SO <sub>4</sub> ) <sub>3</sub> , FeCl <sub>3</sub> , Fe(OH) <sub>3</sub> , Fe(CIO <sub>4</sub> ) <sub>3</sub> , Cu(NO <sub>3</sub> ) <sub>2</sub> , CuSO <sub>4</sub> , CuCl <sub>2</sub> , Cu(OH) <sub>2</sub> , and Cu(CIO <sub>4</sub> ) <sub>2</sub> ..... | 17 |
| <b>Table S2</b> Adsorption percentages of the <b>ONT</b> for Fe <sup>3+</sup> and Cu <sup>2+</sup> .....                                                                                                                                                                        | 17 |
| <b>Table S3</b> Comparison of the LODs and adsorption rates of different fluorescent Chemosensors for Fe <sup>3+</sup> .....                                                                                                                                                    | 18 |
| <b>Table S4</b> Comparison of the LODs and adsorption rates of different fluorescent Chemosensors for Cu <sup>2+</sup> .....                                                                                                                                                    | 18 |
| <b>References</b> .....                                                                                                                                                                                                                                                         | 19 |

## Materials and methods

All the cations were purchased from Alfa Aesar Chemical, the anions were used from their tetrabutylammonium (TBA) salts and purchased from Sigmae Aldrich Chemical. They are stored in a vacuum desiccator. Fresh distilled water was used throughout the experiment. All other reagents and solvents were commercially available at analytical grade, which were used without further purification.  $^1\text{H}$  NMR spectra were recorded on a Mercury-600 BB spectrometer at 600 MHz and a Mercury-400 BB spectrometer at 400 MHz.  $^{13}\text{C}$  NMR spectra were recorded on a Mercury-600 BB spectrometer at 150 MHz and a Mercury-400 BB spectrometer at 101 MHz. The fluorescence spectra were recorded with a Shimadzu RF-5301 spectrofluorimeter. The FT-IR was performed on a Digilab FTS-3000 FT-IR spectrophotometer. Mass spectra were recorded on an esquire 6000 MS instrument equipped with an electrospray (ESI) ion source and version 3.4 of Bruker Daltonics Data Analysis as the data collection system. The X-ray diffraction analysis (XRD) was performed in a transmission mode with a Rigaku RINT2000 diffractometer equipped with graphite monochromated CuK $\alpha$  radiation ( $\lambda = 1.54073 \text{ \AA}$ ).

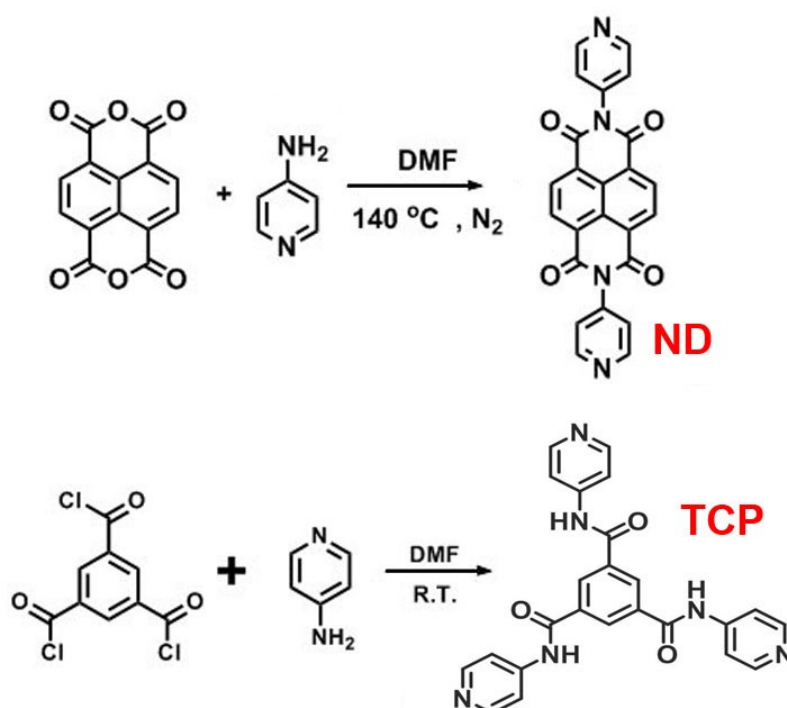

**Scheme S1** Synthesis of **ND** and **TCP**.

### Synthesis of ND

1,4,5,8-Naphthalene dianhydride (2.6 g, 10 mmol) and 4-aminopyridine (1.88 g, 20 mmol) was added into about 50 mL DMF in a reaction flask equipped with a stir bar and the reaction mixture was stirred for 72 h at 140 °C under N<sub>2</sub> atmosphere (Scheme S1). At the end of the reaction, the obtained black precipitate was filtered, washed three times with hot ethanol solution, and then recrystallized with DMSO solution and H<sub>2</sub>O to give a pink powder product **ND** (3.381 g, yield: 80.5%, m. p. > 300 °C). <sup>1</sup>H NMR (DMSO-*d*<sub>6</sub>, 600 MHz): δ 7.61-7.60 (t, 4 H), δ 8.75 (d, *J* = 5.1 Hz, 4 H), δ 8.83 and 8.82 (s, 4 H); <sup>13</sup>C NMR (DMSO-*d*<sub>6</sub>, 150MHz): 162.90, 151.21, 144.11, 131.02, 127.45, 125.45; ESI-MS *m/z*: calcd [**ND**+H]<sup>+</sup> [C<sub>24</sub>H<sub>12</sub>N<sub>4</sub>O<sub>4</sub>+H]<sup>+</sup> = 421.0931; found: 421.0930.

### Synthesis of TCP

The **TCP** was synthesized according to literature method.<sup>S1</sup> **TCP** was synthesized as follow: a solution of mixture of trimesoyl chloride (0.5278 g, 2.0 mmol) and triethylamine (1-2 d) was slowly added into the solution of 4-aminopyridine (0.6211 g, 6.6 mmol) in DMF (10 mL), the mixture was stirred at room temperature for 12 h, getting a white solid. The solid is vacuumed suction filtration and washed with cold ethanol solution (10 mL), finally the product solid was followed by drying in a vacuum oven at 40 °C for 24 h. (Yield: 90%. M.P.: 167 °C). <sup>1</sup>H NMR (400 MHz, DMSO-*d*<sub>6</sub>, room temperature): δ 11.78 (s, 3 H), δ 8.99 (s, 3 H), δ 8.68 (m, 6 H), δ 8.25 (m, 6 H); <sup>13</sup>C NMR (DMSO-*d*<sub>6</sub>, 150MHz): 165.68, 149.58, 135.07, 131.36, 114.75; ESI-MS *m/z*: calcd [**TCP**+H]<sup>+</sup> for [C<sub>24</sub>H<sub>18</sub>N<sub>6</sub>O<sub>3</sub>+H]<sup>+</sup> = 439.1513; found: 439.1510.

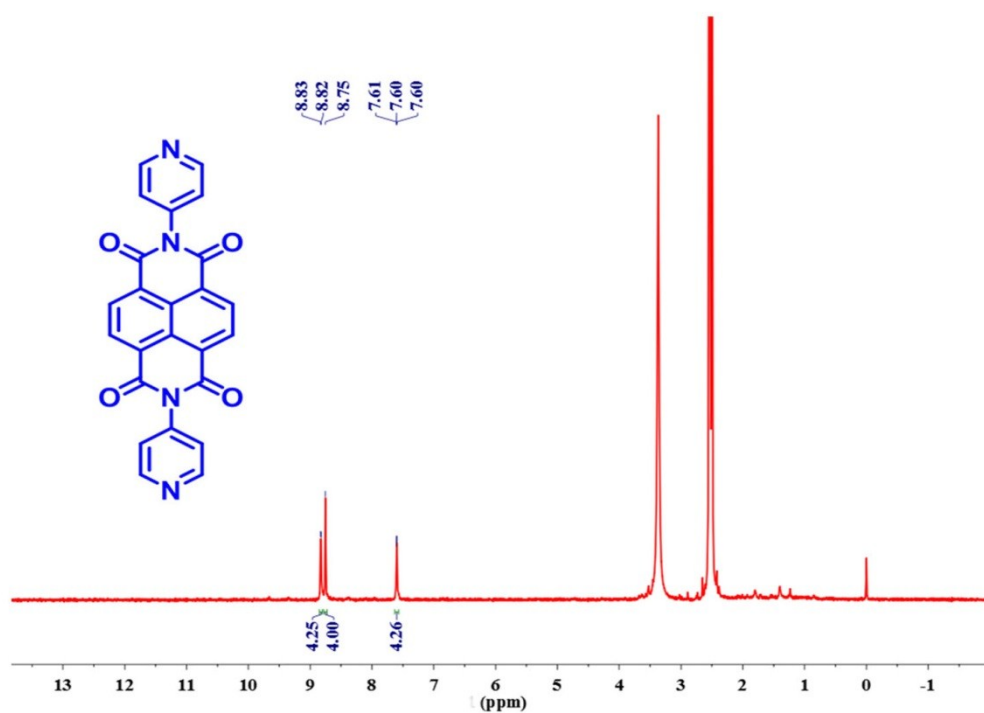

Fig. S1 The  $^1\text{H}$  NMR spectra of ND in  $\text{DMSO-}d_6$  (600 MHz, 298K).

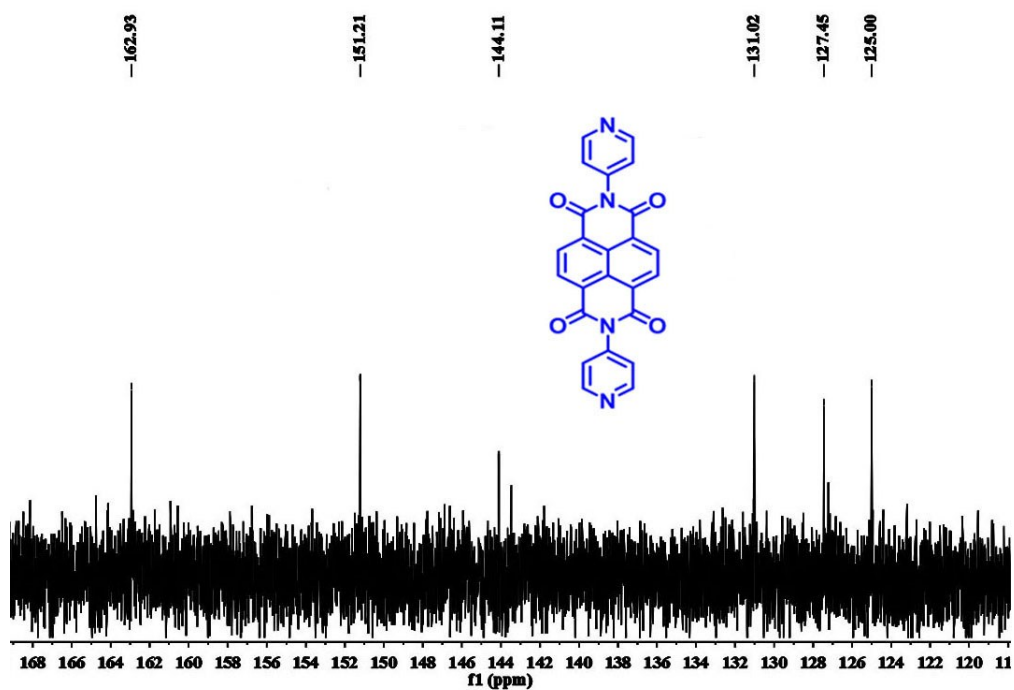

Fig. S2 The  $^{13}\text{C}$  NMR spectra of ND in  $\text{DMSO-}d_6$  (150 MHz, 298K).

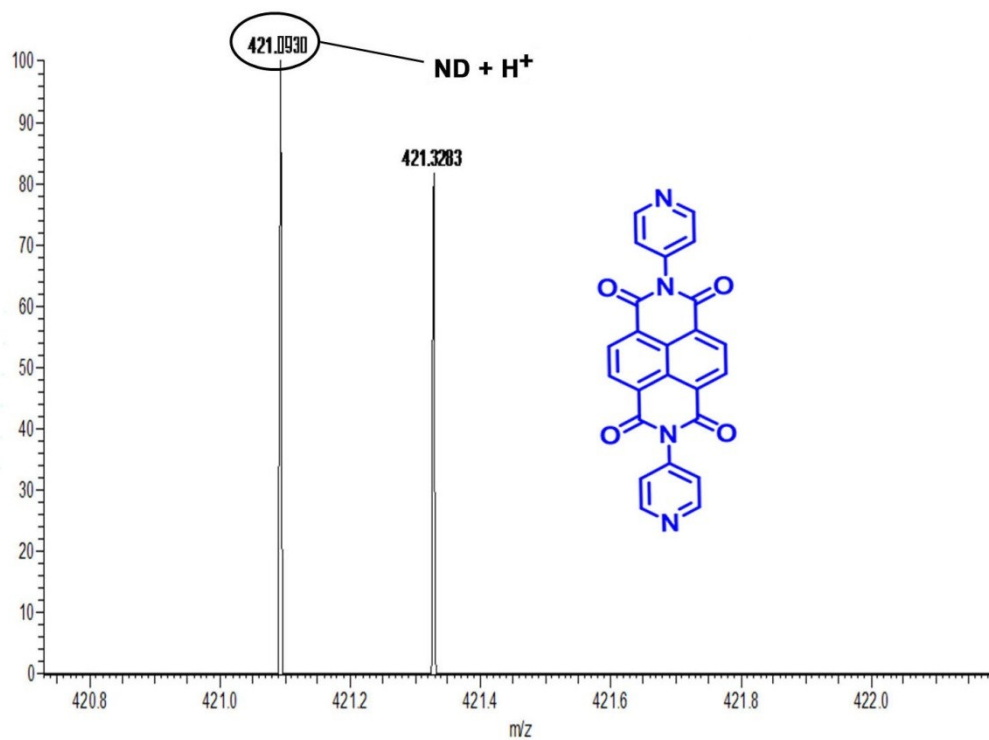

**Fig. S3** ESI-MS spectra of compound **ND**.

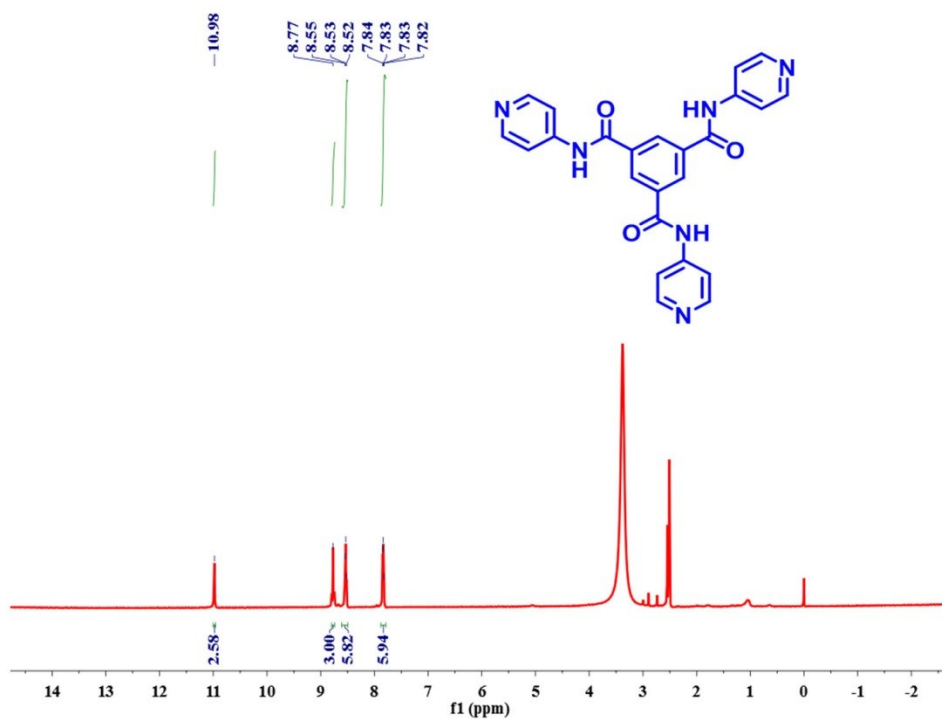

**Fig. S4** <sup>1</sup>H NMR spectra of compound **TCP** in DMSO-*d*<sub>6</sub> (600 MHz, 298K).

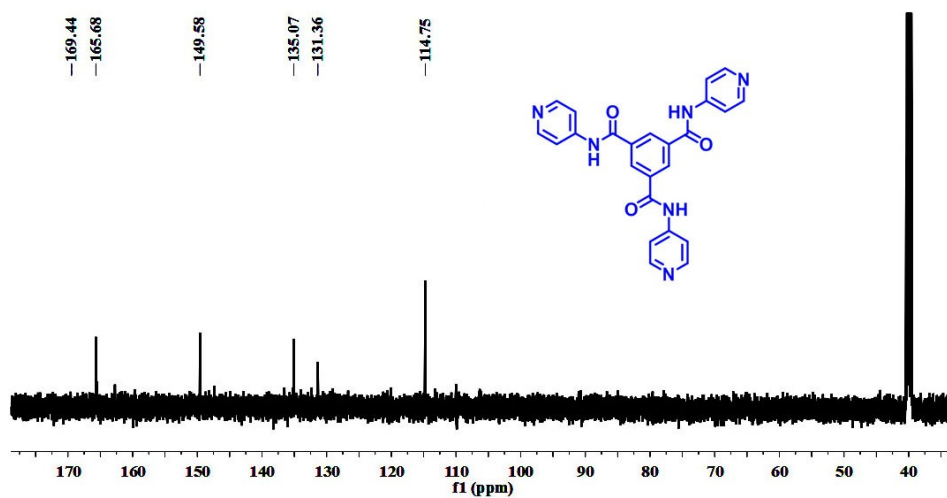

Fig. S5 The  $^{13}\text{C}$  NMR spectra of TCP DMSO- $d_6$  (150 MHz, 298K).

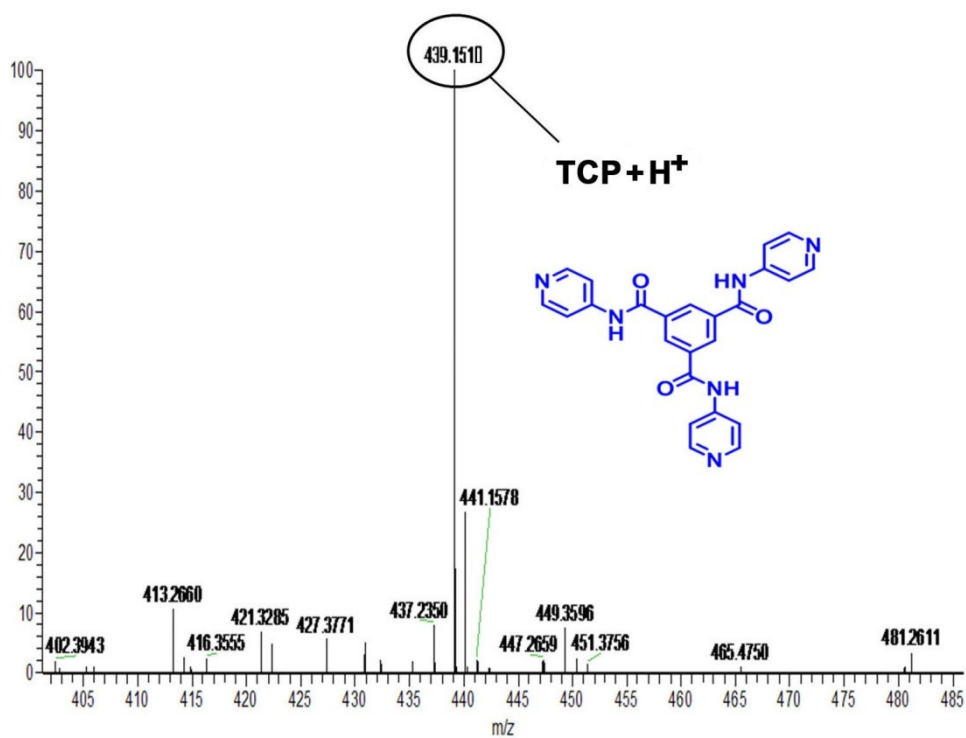

Fig. S6 ESI-MS spectra of TCP.



**Table S1** Gelation behavior of the **ONT** in different solvents

| Entry | Solvents              | State <sup>a</sup> | CGC <sup>b</sup> | T <sub>gel</sub> <sup>c</sup> (°C, wt/v %) |
|-------|-----------------------|--------------------|------------------|--------------------------------------------|
| 1     | Methanol              | <b>P</b>           | \                | \                                          |
| 2     | Ethanol               | <b>P</b>           | \                | \                                          |
| 3     | Isopropanol           | <b>S</b>           | \                | \                                          |
| 4     | n-Propanol            | <b>S</b>           | \                | \                                          |
| 5     | n-Butyl alcohol       | <b>S</b>           | \                | \                                          |
| 6     | n-Hexanol             | <b>S</b>           | \                | \                                          |
| 7     | Formic acid           | <b>S</b>           | \                | \                                          |
| 8     | Acetic acid           | <b>P</b>           | \                | \                                          |
| 9     | Propanoic acid        | <b>P</b>           | \                | \                                          |
| 10    | n-Butyric acid        | <b>P</b>           | \                | \                                          |
| 11    | Caproic acid          | <b>P</b>           | \                | \                                          |
| 12    | Ethyl acetate         | <b>P</b>           | \                | \                                          |
| 13    | Methylene             | <b>P</b>           | \                | \                                          |
| 14    | Chloride              | <b>P</b>           | \                | \                                          |
| 15    | Chloroform            | <b>S</b>           | <b>4</b>         | <b>65</b>                                  |
| 16    | DMF/H <sub>2</sub> O  | <b>P</b>           | \                | \                                          |
| 17    | Acetonitrile          | <b>G</b>           | <b>3</b>         | <b>76</b>                                  |
| 18    | DMSO/H <sub>2</sub> O | <b>P</b>           | \                | \                                          |
| 19    | Glycerol              | <b>P</b>           | \                | \                                          |

a: G, P and S denote gelation, precipitation and solution, respectively.

b: the critical gelation concentration (3%, wt%, 10 mg/mL=1%).

c: the gelation temperature (°C).

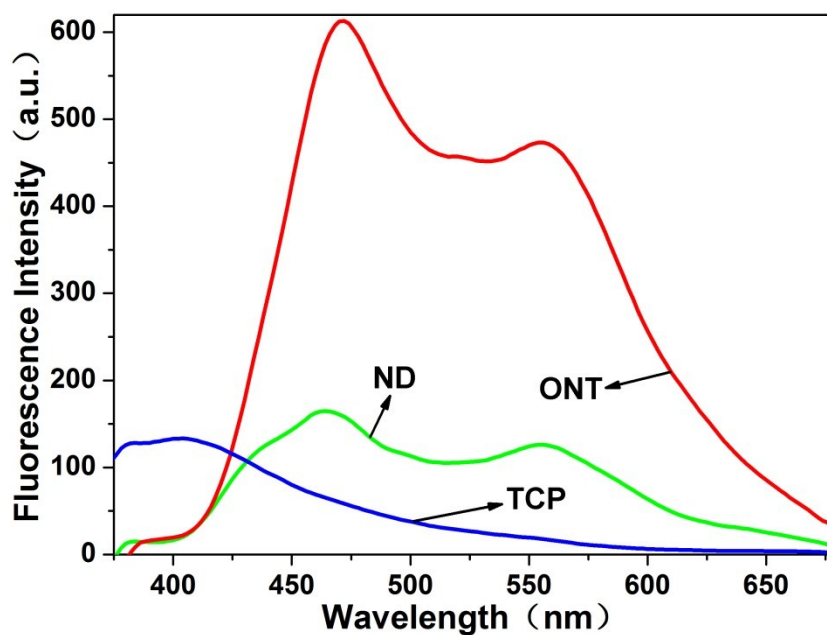

**Fig. S7** Fluorescent spectra of the **ND**, **TCP** and the  $\pi$ -gel **ONT** in DMSO-H<sub>2</sub>O (2:1, v/v) binary solution and  $\lambda_{\text{ex}} = 350$  nm, respectively.

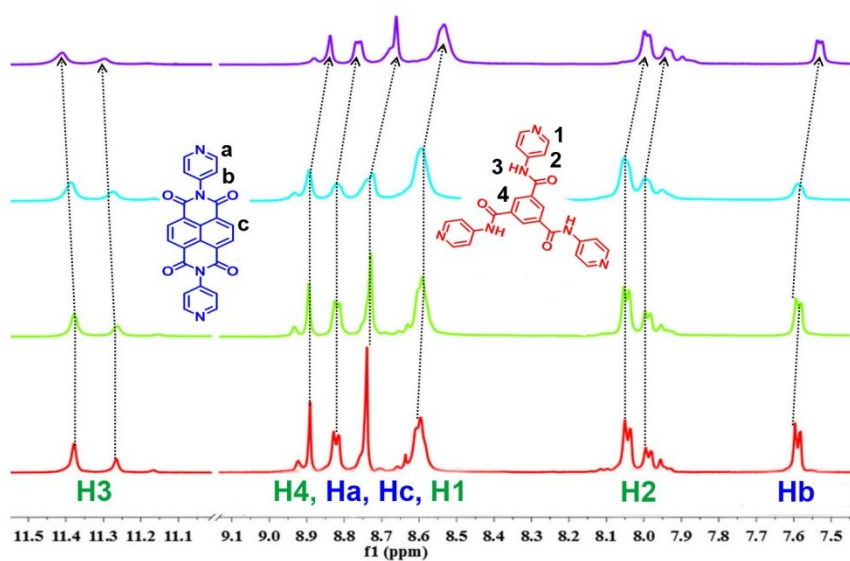

**Fig. S8** Partial concentration-dependent <sup>1</sup>H NMR spectra (400 MHz, 298 K) of the **ONT** at various concentrations: (a) 4.0 mM; (b) 8.0 mM; (c) 12.0 mM; (d) 16.0 mM

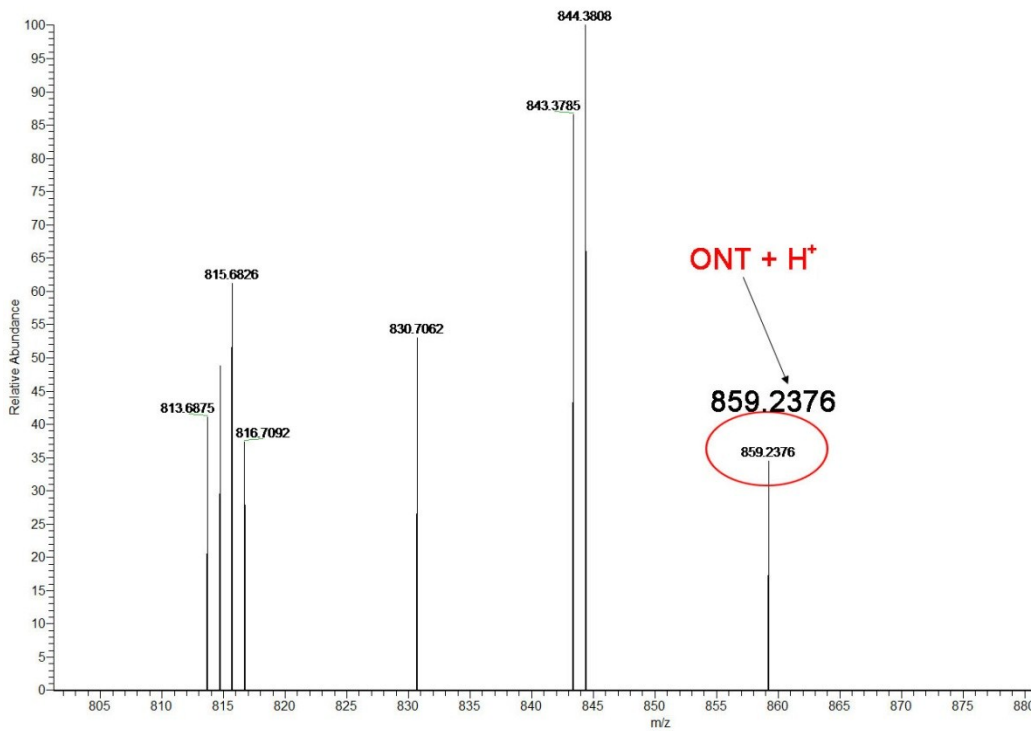

**Fig. S9** ESI-MS spectra of the host-guest complex (**ONT**) formed between **ND** and **TCP**.

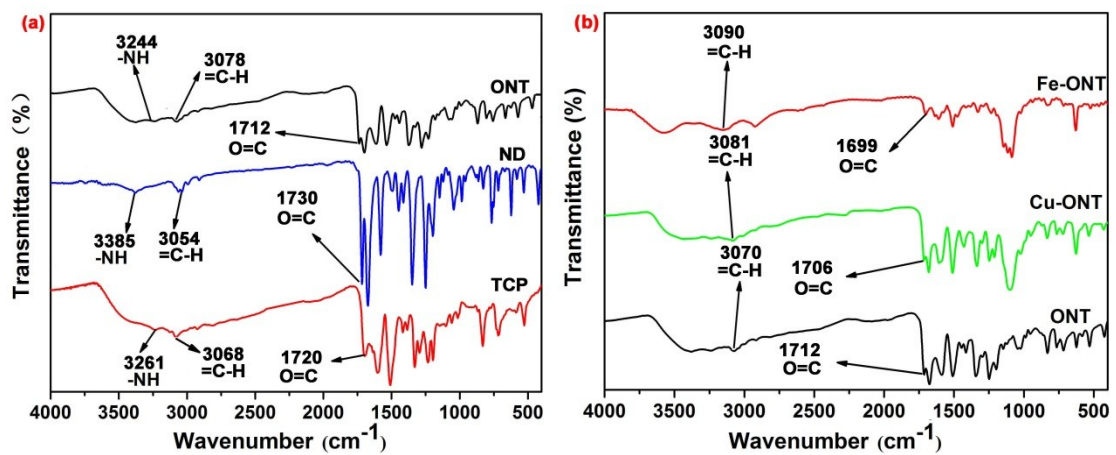

**Fig. S10** FT-IR spectra of (a) Powder **ND**, **TCP** and xerogel **ONT**; (b) Xerogel **ONT**, **Fe-ONT** and xerogel **Cu-ONT**.

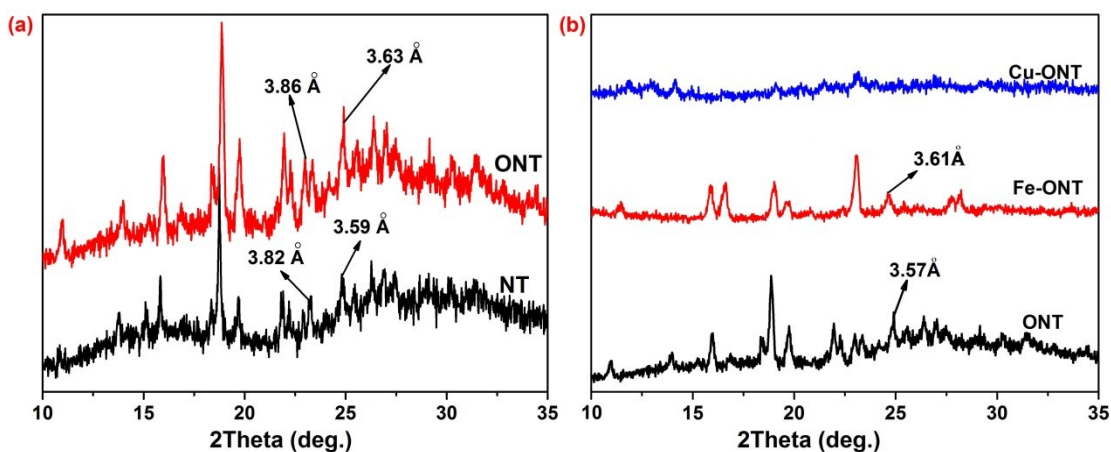

**Fig. S11** XRD patterns of (a) Powder NT (the mixtures of ND and TCP) and xerogel ONT; (b) Xerogel ONT, xerogel Fe-ONT and xerogel Cu-ONT.

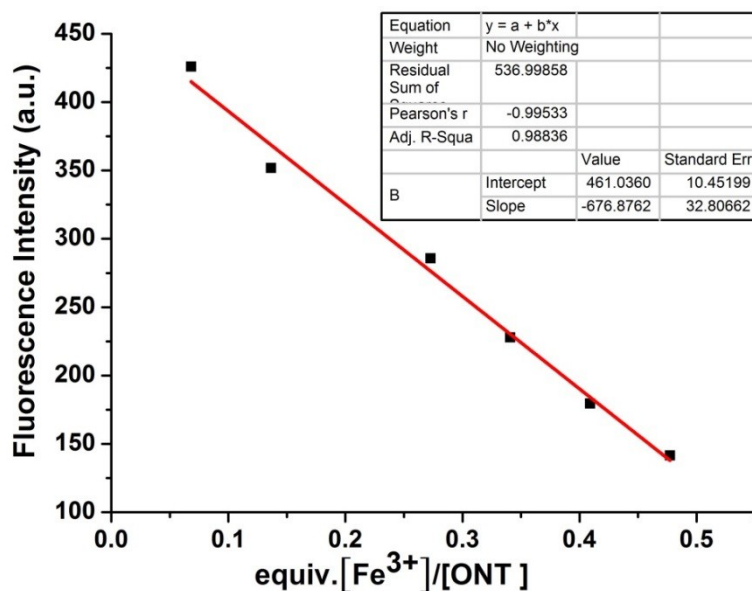

**Fig. S12** The photograph of the linear range: the ONT for Fe<sup>3+</sup>.

The result of the analysis as follows:

Linear Equation:  $Y = -616.8762 \times X + 461.0360$

$R^2 = 0.98836$

$S = 6.17 \times 10^8$

$$\delta = \sqrt{\frac{\sum(F_i - F_0)^2}{N - 1}} = 13.5735 \quad (N = 20)$$

$LOD = K \times \delta / S = 6.60 \times 10^{-8} \text{ M}$

$K=3$

$F_0$  is fluorescence intensity of ONT,  $F_i$  is the average of fluorescence intensity  $F_0$ .

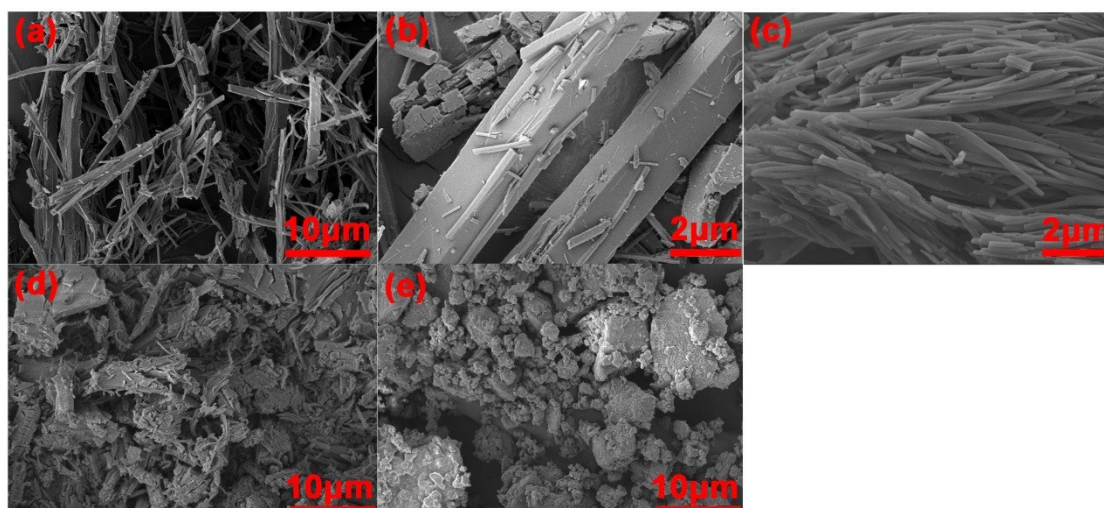

Fig. S13 SEM images of (a) Xerogel ONT; (b) Powder ND; (c) Powder TCP; (d) Xerogel Fe-ONT; (e) Xerogel Cu-ONT.

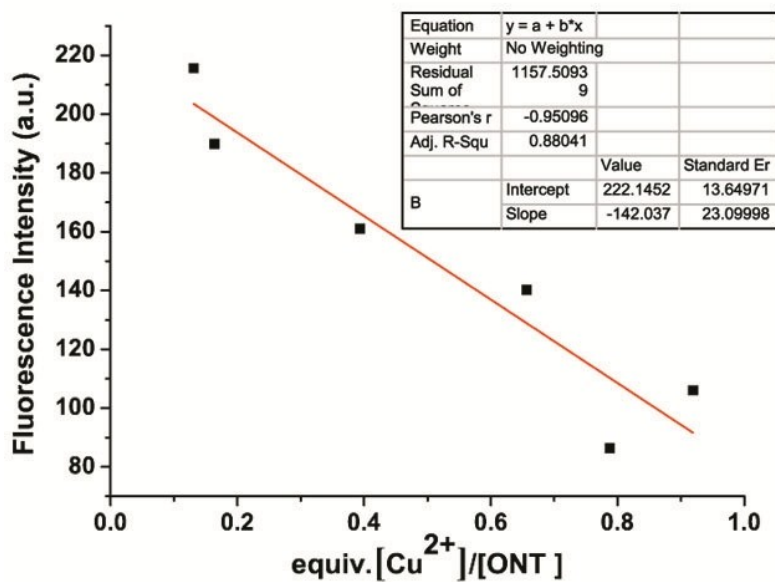

Fig. S14 The photograph of the linear range: the ONT for  $\text{Cu}^{2+}$

The result of the analysis as follows:

Linear Equation:  $Y = -142.037 \times X + 222.1452$

$R^2 = 0.88041$

$S = 1.42 \times 10^8$

$$\delta = \sqrt{\frac{\sum(F_i - F_0)^2}{N - 1}} = 8.2963 \quad (N = 20)$$

$\text{LOD} = K \times \delta / S = 1.75 \times 10^{-7} \text{ M}$

$K = 3$

$F_0$  is fluorescence intensity of ONT,  $F_i$  is the average of fluorescence intensity  $F_0$ .

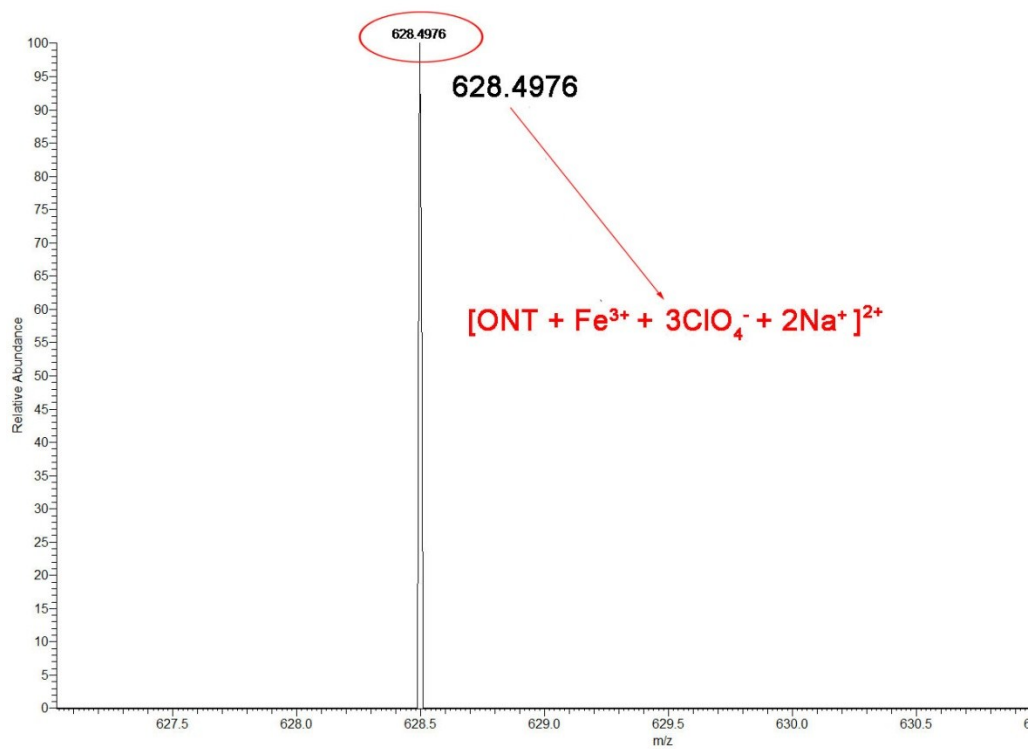

Fig. S15 The ESI-MS spectra of Fe-ONT.

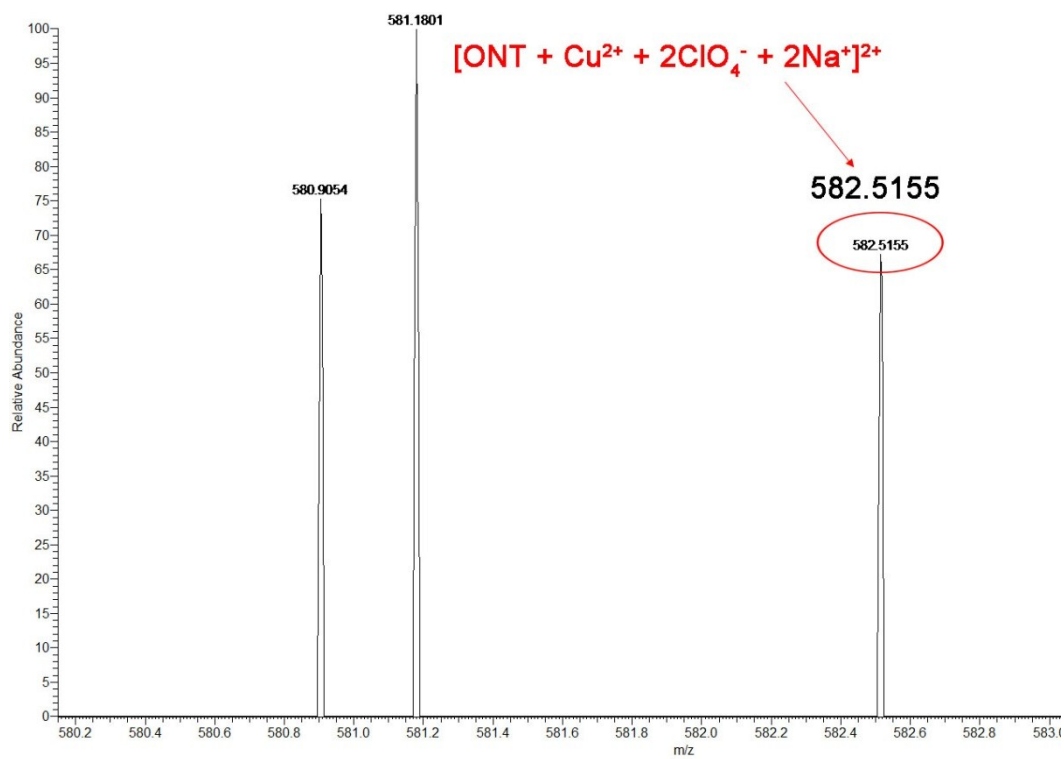

Fig. S16 The ESI-MS spectra of Cu-ONT.

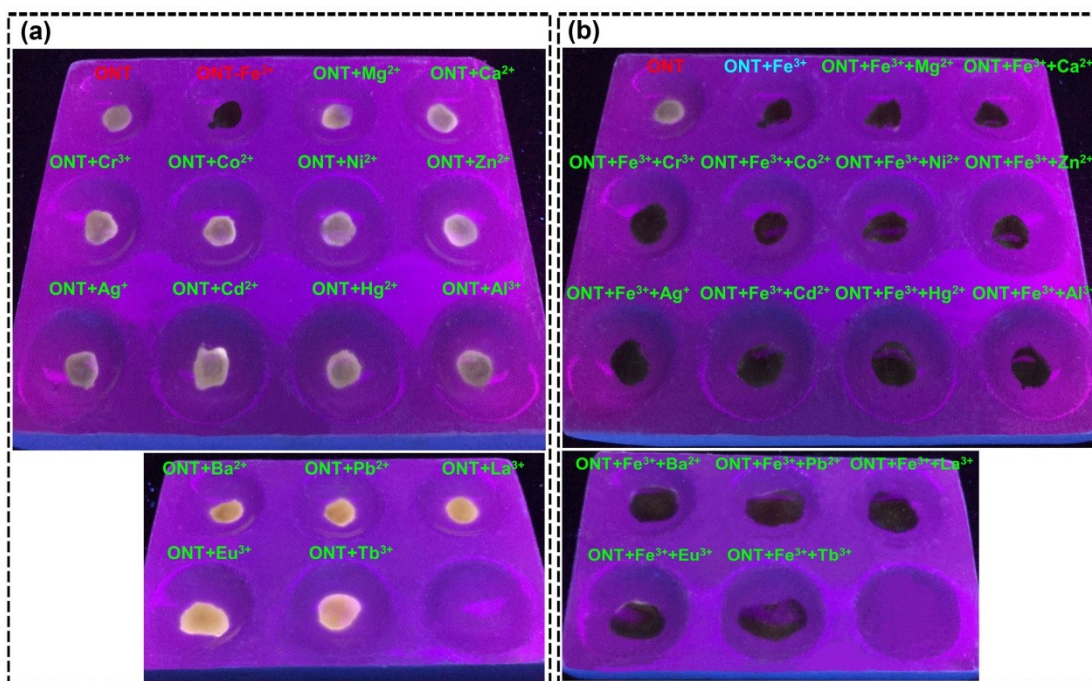

**Fig. S17** The control experiment: the fluorescent responses of (a) the **ONT** and (b) the **Fe-ONT** to the presence of various cations (Fe<sup>3+</sup>, Mg<sup>2+</sup>, Ca<sup>2+</sup>, Cr<sup>3+</sup>, Co<sup>2+</sup>, Ni<sup>2+</sup>, Zn<sup>2+</sup>, Ag<sup>+</sup>, Cd<sup>2+</sup>, Hg<sup>2+</sup>, Al<sup>3+</sup>, Ba<sup>2+</sup>, Pb<sup>2+</sup>, La<sup>3+</sup>, Eu<sup>3+</sup> and Tb<sup>3+</sup>).

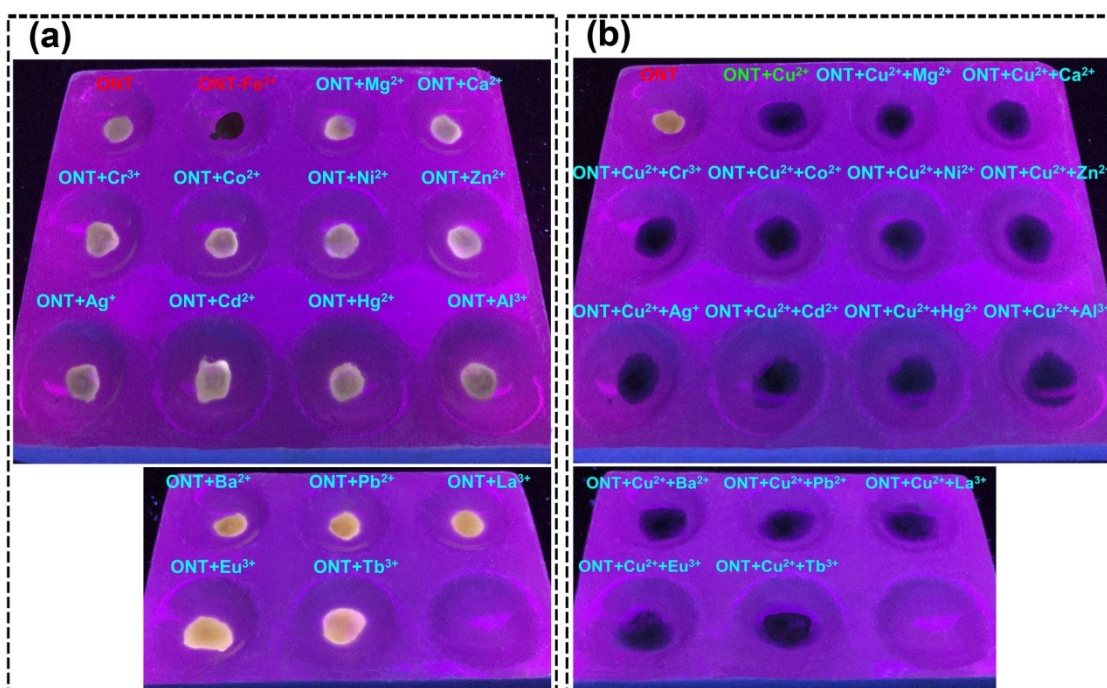

**Fig. S18** The control experiment: the fluorescent responses of (a) the **ONT** and (b) the **Cu-ONT** to the presence of various cations (Cu<sup>2+</sup>, Mg<sup>2+</sup>, Ca<sup>2+</sup>, Cr<sup>3+</sup>, Co<sup>2+</sup>, Ni<sup>2+</sup>, Zn<sup>2+</sup>, Ag<sup>+</sup>, Cd<sup>2+</sup>, Hg<sup>2+</sup>, Al<sup>3+</sup>, Ba<sup>2+</sup>, Pb<sup>2+</sup>, La<sup>3+</sup>, Eu<sup>3+</sup> and Tb<sup>3+</sup>).

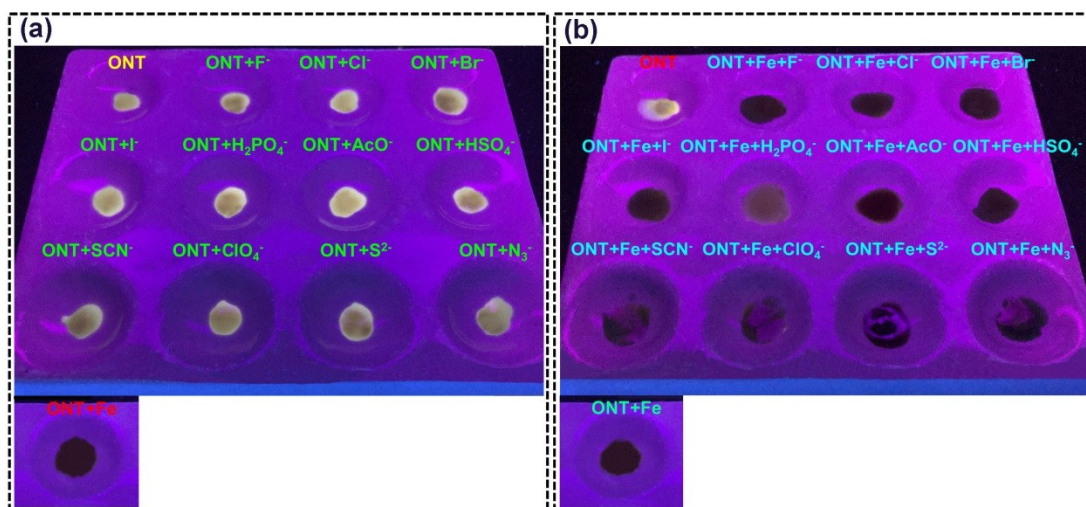

**Fig. S19** The control experiment: the **Fe-ONT** treated by water solutions of various anions ( $F^-$ ,  $Cl^-$ ,  $Br^-$ ,  $I^-$ ,  $H_2PO_4^-$ ,  $AcO^-$ ,  $HSO_4^-$ ,  $SCN^-$ ,  $ClO_4^-$ ,  $S^{2-}$  and  $N_3^-$ ).

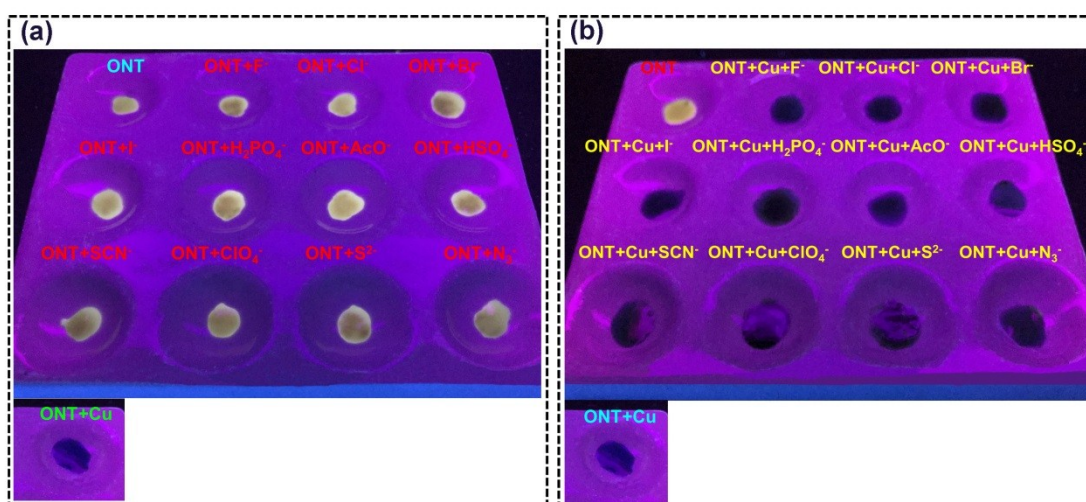

**Fig. S20** The control experiment: the **Cu-ONT** treated by water solutions of various anions ( $F^-$ ,  $Cl^-$ ,  $Br^-$ ,  $I^-$ ,  $H_2PO_4^-$ ,  $AcO^-$ ,  $HSO_4^-$ ,  $SCN^-$ ,  $ClO_4^-$ ,  $S^{2-}$  and  $N_3^-$ ), cations ( $Fe^{3+}$ ,  $Cu^{2+}$ ) and the mixtures of  $Fe^{3+}$  and  $Cu^{2+}$ ).



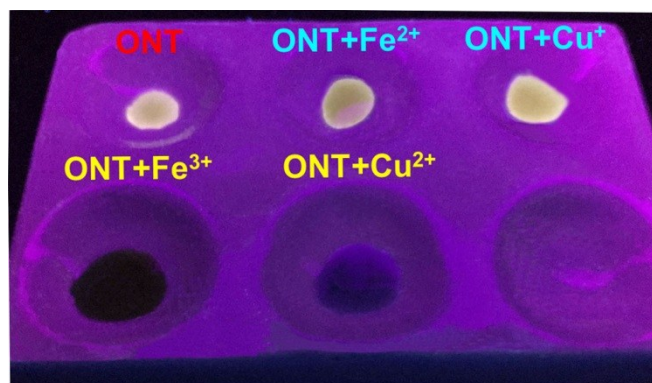

**Fig. S21** The control experiment: the **ONT** treated by water solutions of various cations ( $\text{Fe}^{2+}$ ,  $\text{Cu}^+$ ,  $\text{Fe}^{3+}$  and  $\text{Cu}^{2+}$ ).

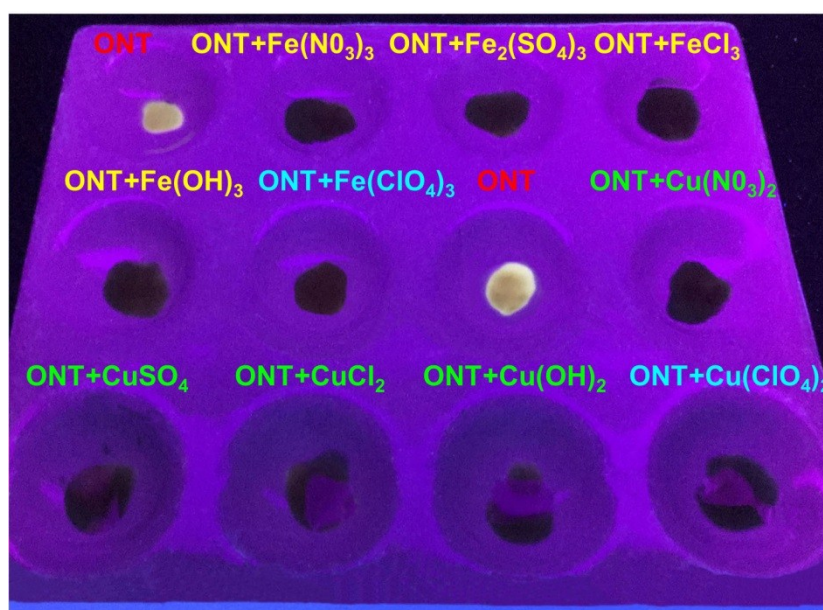

**Fig. S22** The control experiment: the **ONT** treated by water solutions of various anions ( $\text{Fe}(\text{NO}_3)_3$ ,  $\text{Fe}_2(\text{SO}_4)_3$ ,  $\text{FeCl}_3$ ,  $\text{Fe}(\text{OH})_3$ ,  $\text{Fe}(\text{ClO}_4)_3$ ,  $\text{Cu}(\text{NO}_3)_2$ ,  $\text{CuSO}_4$ ,  $\text{CuCl}_2$ ,  $\text{Cu}(\text{OH})_2$  and  $\text{Cu}(\text{ClO}_4)_2$ ).

**Table S2** Adsorption percentages of the **ONT** for  $\text{Fe}^{3+}$  and  $\text{Cu}^{2+}$ .

| Entry | Ion              | Initial concentration(M) | Residual concentration(M) | Absorbing rate(%) |
|-------|------------------|--------------------------|---------------------------|-------------------|
| 1     | $\text{Fe}^{3+}$ | $1 \times 10^{-5}$       | $0.65 \times 10^{-6}$     | 93.5%             |
| 2     | $\text{Cu}^{2+}$ | $1 \times 10^{-5}$       | $0.83 \times 10^{-6}$     | 91.7%             |

**Table S3** Comparison of the LODs and adsorption rates of different fluorescent Chemosensors for Fe<sup>3+</sup>.

| Refs             | Fluorescent Chemosensors                        | LOD (μM)     | Adsorption rate (%) |
|------------------|-------------------------------------------------|--------------|---------------------|
| 2                | Azo and imine functionalized 2-naphthols        | 0.976        | /                   |
| 3                | Bispillar[5]arene                               | 0.156        | /                   |
| 4                | Bis-naphthalimide functionalized pillar[5]arene | 0.061        | 99.8%               |
| 5                | Functionalized 1,4-benzenedicarboxylic acid     | 0.9          | /                   |
| 6                | Graphene Quantum Dots                           | 0.45         | /                   |
| 7                | 1-pyrene carboxyaldehyde derivative             | 0.26         | /                   |
| 8                | Polyindole/cadmium sulphide nanocomposite       | 0.24         | /                   |
| 9                | Aminoantipyrine                                 | 0.21         | /                   |
| 10               | Pyrazoline derivative                           | 1.40         | /                   |
| 11               | 2,5-diphenylfuran and 8-hydroxyquinoline        | 0.97         | /                   |
| <b>This work</b> | <b>Supramolecular AIE π-gel (ONT)</b>           | <b>0.066</b> | <b>93.5%</b>        |

**Table S4** Comparison of the LODs and adsorption rates of different fluorescent Chemosensors for Cu<sup>2+</sup>.

| Refs             | Fluorescent Chemosensors                    | LOD (μM)     | Adsorption rate (%) |
|------------------|---------------------------------------------|--------------|---------------------|
| 12               | Phthalocyanine tetrasulfonic acid           | 0.55         | /                   |
| 13               | Gold Nanoparticles                          | 0.30         | /                   |
| 14               | Fluorogenic cellulose membrane              | 0.73         | /                   |
| 15               | O-phenylazo aniline                         | 0.57         | /                   |
| 16               | Ethylenediamine (EDA)                       | 0.30         | /                   |
| 17               | Pyridine coupled mono and bisbenzimidazoles | 9.51         | /                   |
| 18               | Pillar[5]arene derivative                   | 0.1          | 96.96%              |
| 19               | Coumarin derivative                         | 0.37         | /                   |
| 20               | 4'-(4-Pyridinyl)-2,2',6',2''-terpyridine    | 3.98         | /                   |
| 21               | Phenanthroimidazole derivative              | 0.87         | /                   |
| <b>This work</b> | <b>Supramolecular AIE π-gel (ONT)</b>       | <b>0.175</b> | <b>91.70%</b>       |

## References

- (S1) Y. Q. Fan, J. Liu, Y. Y. Chen, X. W. Guan, J. Wang, H. Yao, Y. M. Zhang, T. B. Wei and Q. Lin, *J. Mater. Chem. C.*, 2018, **6**, 1333-13335.
- (S2) A. Panja and K. Ghosh, *Mater. Chem. Front.*, 2018, **2**, 1866-1875.
- (S3) T. B. Wei, J. F. Chen, X. B. Cheng, H. Li, B. B. Han, H. Yao, Y. M. Zhang and Q. Lin,

- Polym. Chem.*, 2017, **8**, 2005-2009.
- (S4) Y. M. Zhang, Y. F. Li, K. P. Zhong, W. J. Qu, H. Yao, T. B. Wei and Q. Lin, *New. J. Chem.*, 2018, **42**, 16167-16173.
- (S5) C. X. Yang, H. B. Ren, X. P. Yan, *Anal. Chem.*, 2013, **85**, 7441-7446.
- (S6) X. Zhu, Z. Zhang, Z. Xue, C. Huang, Y. Shan, C. Liu, X. Qin, W. Yang, X. Chen, T. Wang, *Anal. Chem.*, 2017, **89**, 12054-12058.
- (S7) S. D. Padghan, A. L. Puyad, R. S. Bhosale, S. V. Bhosale, S. V. Bhosale, *Photochem. Photobiol. Sci.*, 2017, **16**, 1591-1595.
- (S8) M. Faraz, A. Abbasi, F. K. Naqvi, N. Khare, R. Prasad, I. Barman, R. Pandey, *Sens. Actuators B.*, 2018, **269**, 195-202.
- (S9) Y. Zhou, H. Zhou, J. Zhang, L. Zhang, J. Niu, *Spectrochim. Acta. Part A.*, 2012, **98**, 14-17.
- (S10) S. Hu, S. Zhang, C. Gao, C. Xu, Q. Gao, *Spectrochim. Acta. Part A.*, 2013, **113**, 325-331.
- (S11) S. Hu, G. Wu, C. Xu, J. Dong, Q. Gao, *J. Photochem. Photobiol. A.*, 2013, **270**, 37-42.
- (S12) L. K. Kumawat, N. Mergu, A. K. Singh, V. K. Gupta, *Sens. Actuators. B.*, 2015, **212**, 389-394.
- (S13) X. Xu, G. Duan, Y. Li, G. Liu, J. Wang, H. Zhang, Z. Dai, W. Cai, *ACS Appl. Mater. Interfaces.*, 2014, **6**, 65-71.
- (S14) M. Li, Z. Liu, S. Wang, D. G. Calatayud, W. H. Zhu, T. D. James, L. Wang, B. Mao, H. N. Xiao, *Chem. Commun.*, 2018, **54**, 184-187.
- (S15) J. Jung, J. Jo, A. Dinescu, *Org. Process. Res. Dev.*, 2017, **21**, 1689-1693.
- (S16) S. H. Yun, L. Xia, T. N. J. I. Edison, M. Pandurangan, D. H. Kim, S. H. Kim, Y. R. Lee, *Sens. Actuators. B.*, 2017, **240**, 988-995.
- (S17) S. Panja, S. Bhattacharyab and K. Ghosh, *Mater. Chem. Front.*, 2018, **2**, 385-395.
- (S18) Q. Lin, Y. Q. Fan, P. P. Mao, L. Liu, J. Liu, Y. M. Zhang, H. Yao and T. B. Wei, *Chem. Eur. J.*, 2018, **24**, 777-783.
- (S19) X. J. Meng, S. L. Li, W. B. Ma, J. L. Wang, Z. Y. Hu, D. L. Cao, *Dyes. Pigments.*, 2018, **154**, 194-198.

(S20) J. F. Zhang, J. J. Wu, G. D. Tang, J. Y. Feng, F. M. Luo, B. Xu, C. Zhang, *Sens. Actuators. B.*, 2018, **272**, 166-174.

(S21) S. M. Hwang, J. B. Chae and C. Kim, *Bull. Korean. Chem. Soc.* 2018, **39**, 925-930.
